# Supplementary material for: Cytotoxicity and Radiosensitizing Potentials of Pilosulin-3, a Recombinant Ant Venom, in Breast Cancer Cells
Source: MDPI journal article supplement (doi:10.3390/toxins15120701), 2023-12-15
Supplement: s1 [file s1]

# Cytotoxicity and Radiosensitizing Potentials of Pilosulin-3, a Recombinant Ant Venom, in Breast Cancer Cells

Reema M. Alzeer, Khaled S. Al-Hadyan, Najla M. Al-Harbi, Sara S. Bin Judia, Rafa S. Almeer and Ghazi A. Alsbeih

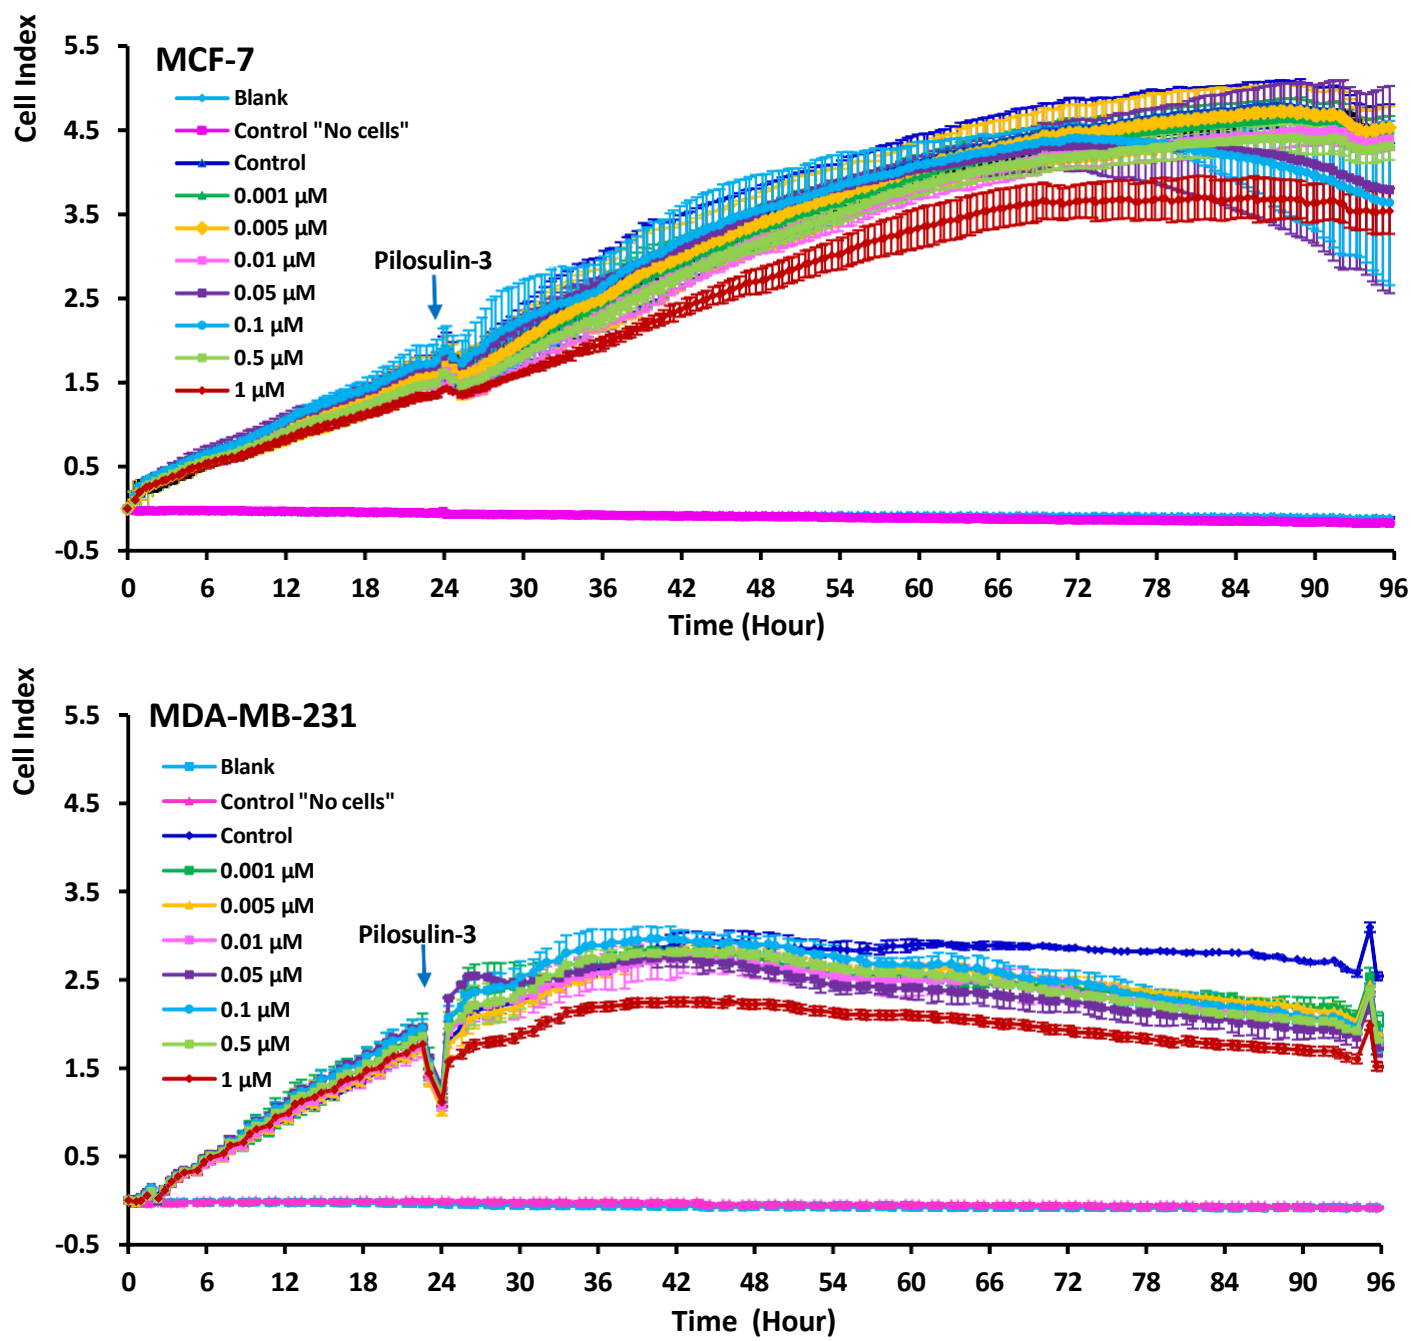

Figure S1. Example of cell proliferation results using the Real-Time Cell Analyzer (RTCA) assay.

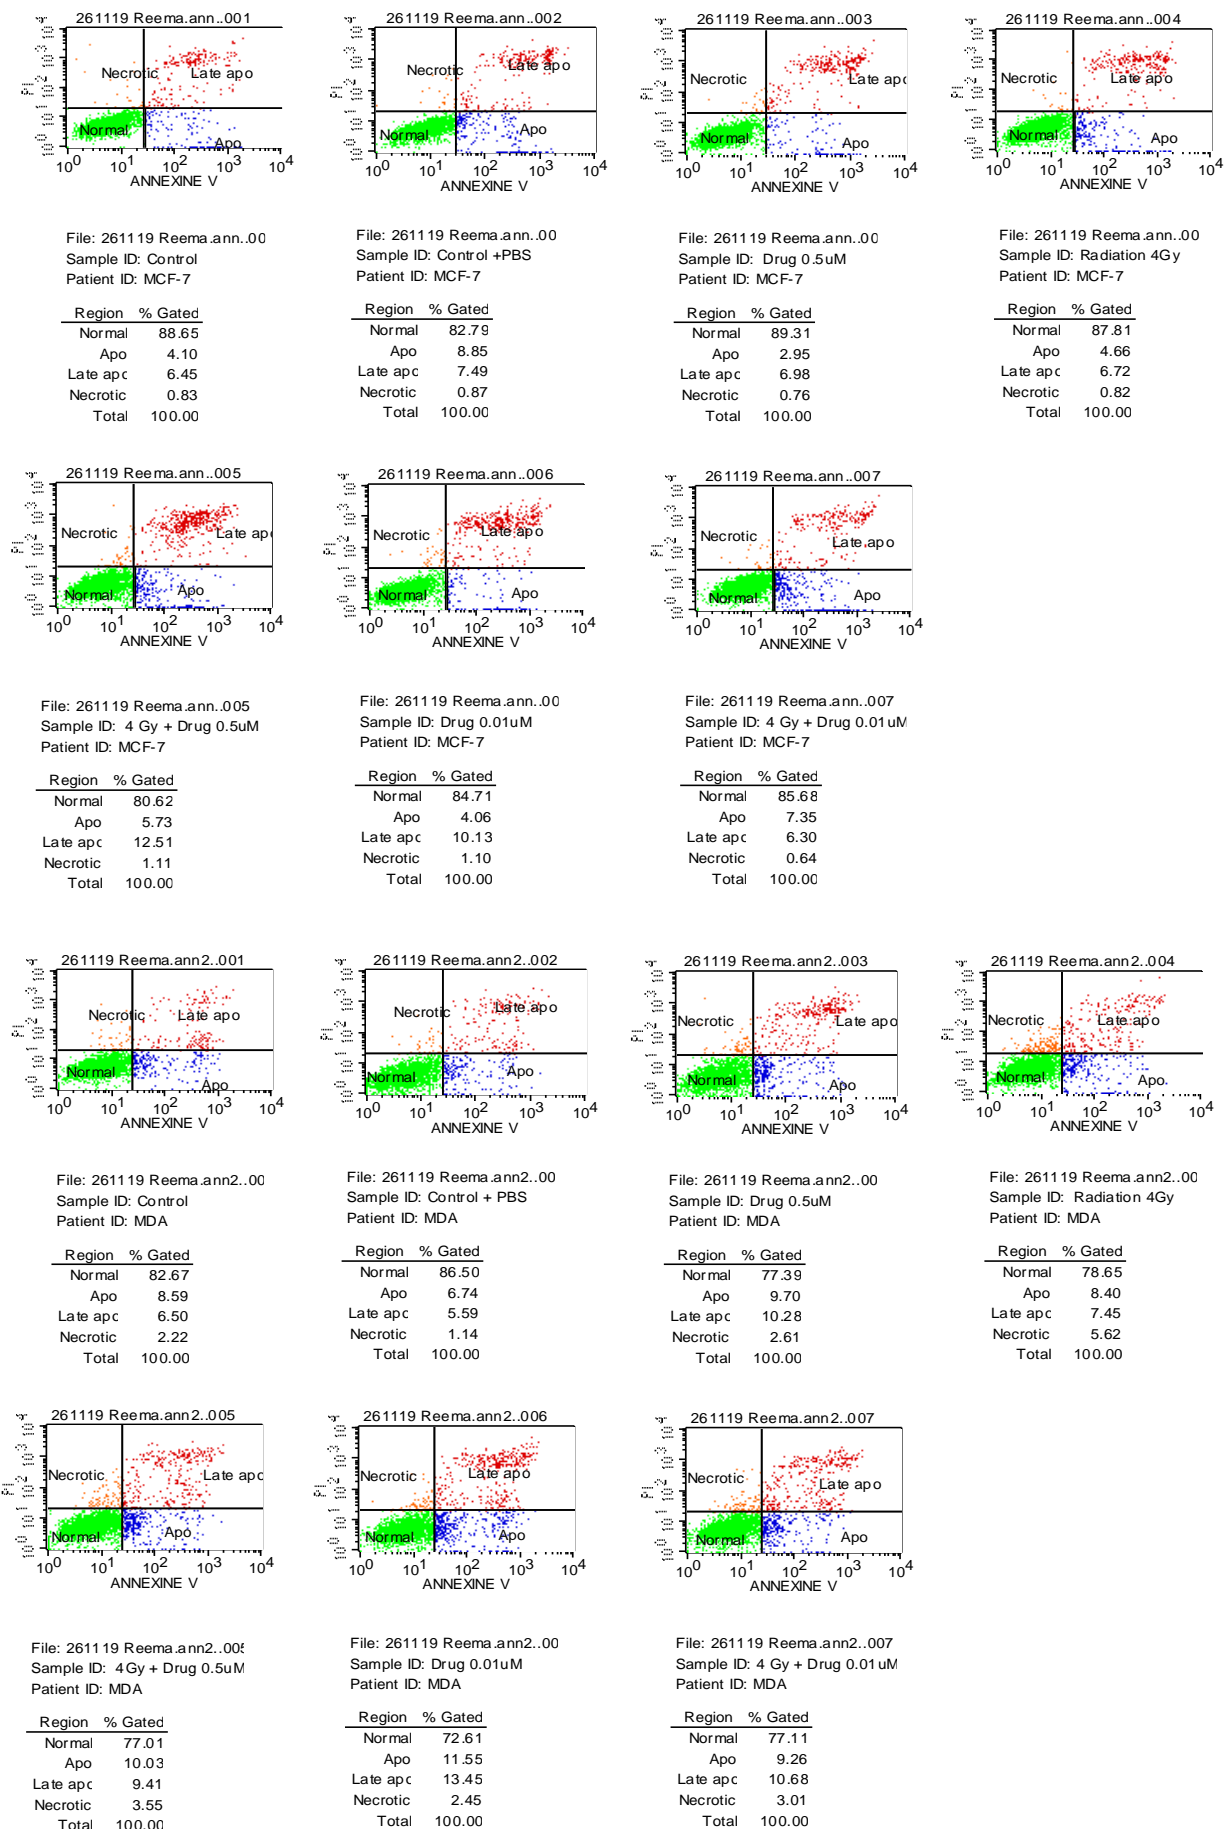

Figure S2. Example of flow cytometry dot-plots results of the effect of Pilosulin-3 on cell cycle in MCF-7 and MDA-MB-231 breast cancer cell lines.

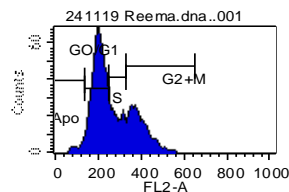

File: 241119 Reema.dna..00  
Sample ID: Control  
Patient ID: MCF-7

| Marker | % Gated |
|--------|---------|
| All    | 100.00  |
| Apo    | 2.78    |
| GO/G1  | 55.31   |
| S      | 16.25   |
| G2+M   | 25.78   |

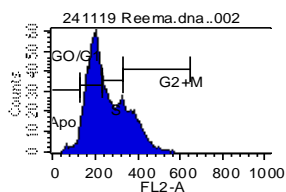

File: 241119 Reema.dna..00  
Sample ID: Control +PBS  
Patient ID: MCF-7

| Marker | % Gated |
|--------|---------|
| All    | 100.00  |
| Apo    | 3.13    |
| GO/G1  | 51.43   |
| S      | 25.75   |
| G2+M   | 20.23   |

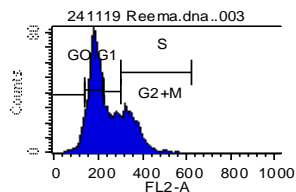

File: 241119 Reema.dna..00  
Sample ID: Drug 0.5uM  
Patient ID: MCF-7

| Marker | % Gated |
|--------|---------|
| All    | 100.00  |
| Apo    | 5.04    |
| GO/G1  | 51.32   |
| S      | 20.01   |
| G2+M   | 23.72   |

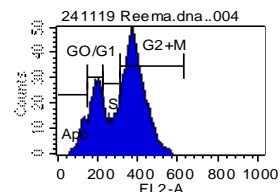

File: 241119 Reema.dna..00  
Sample ID: 4 Gy Radiation  
Patient ID: MCF-7

| Marker | % Gated |
|--------|---------|
| All    | 100.00  |
| Apo    | 6.71    |
| GO/G1  | 19.60   |
| S      | 16.25   |
| G2+M   | 57.61   |

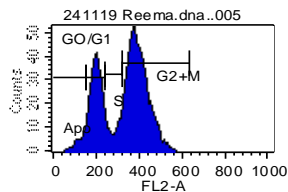

File: 241119 Reema.dna..005  
Sample ID: 4 Gy + Drug 0.5uM  
Patient ID: MCF-7

| Marker | % Gated |
|--------|---------|
| All    | 100.00  |
| Apo    | 4.45    |
| GO/G1  | 26.99   |
| S      | 9.50    |
| G2+M   | 59.99   |

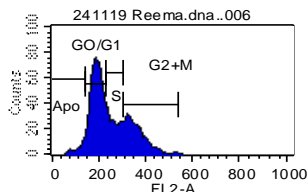

File: 241119 Reema.dna..00  
Sample ID: Drug 0.01uM  
Patient ID: MCF-7

| Marker | % Gated |
|--------|---------|
| All    | 100.00  |
| Apo    | 4.29    |
| GO/G1  | 50.43   |
| S      | 18.84   |
| G2+M   | 27.21   |

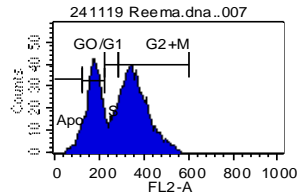

File: 241119 Reema.dna..007  
Sample ID: 4 Gy + Drug 0.01uM  
Patient ID: MCF-7

| Marker | % Gated |
|--------|---------|
| All    | 100.00  |
| Apo    | 3.67    |
| GO/G1  | 31.81   |
| S      | 12.08   |
| G2+M   | 53.26   |

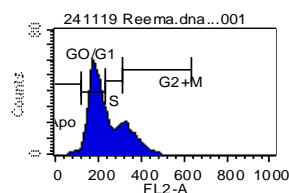

File: 241119 Reema.dna...00  
Sample ID: Control  
Patient ID: MDA

| Marker | % Gated |
|--------|---------|
| All    | 100.00  |
| Apo    | 1.77    |
| GO/G1  | 59.78   |
| S      | 18.87   |
| G2+M   | 19.73   |

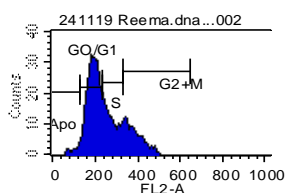

File: 241119 Reema.dna...00  
Sample ID: Control +PBS  
Patient ID: MDA

| Marker | % Gated |
|--------|---------|
| All    | 100.00  |
| Apo    | 2.74    |
| GO/G1  | 56.39   |
| S      | 23.21   |
| G2+M   | 18.03   |

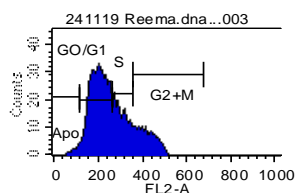

File: 241119 Reema.dna...00  
Sample ID: Drug 0.5uM  
Patient ID: MDA

| Marker | % Gated |
|--------|---------|
| All    | 100.00  |
| Apo    | 1.41    |
| GO/G1  | 60.44   |
| S      | 23.85   |
| G2+M   | 15.49   |

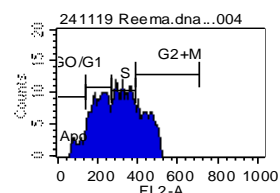

File: 241119 Reema.dna...00  
Sample ID: 4 Gy Radiation  
Patient ID: MDA

| Marker | % Gated |
|--------|---------|
| All    | 100.00  |
| Apo    | 4.80    |
| GO/G1  | 35.10   |
| S      | 37.52   |
| G2+M   | 21.29   |

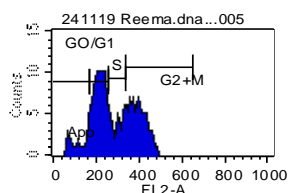

File: 241119 Reema.dna...00  
Sample ID: 4 Gy+ Drug 0.5uM  
Patient ID: MDA

| Marker | % Gated |
|--------|---------|
| All    | 100.00  |
| Apo    | 9.55    |
| GO/G1  | 40.61   |
| S      | 18.08   |
| G2+M   | 33.04   |

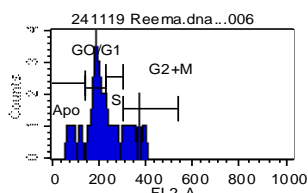

File: 241119 Reema.dna...00  
Sample ID: Drug 0.01uM  
Patient ID: MDA

| Marker | % Gated |
|--------|---------|
| All    | 100.00  |
| Apo    | 13.38   |
| GO/G1  | 51.59   |
| S      | 16.56   |
| G2+M   | 18.47   |

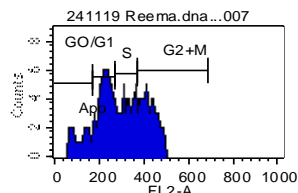

File: 241119 Reema.dna...007  
Sample ID: 4 Gy+ Drug 0.01uM  
Patient ID: MDA

| Marker | % Gated |
|--------|---------|
| All    | 100.00  |
| Apo    | 11.96   |
| GO/G1  | 33.12   |
| S      | 25.89   |
| G2+M   | 29.73   |

Figure S3. Example of flow cytometry histograms results of the effect of Pilosulin-3 on apoptosis induction in MCF-7 and MDA-MB-231 breast cancer cell lines.
